# Supplementary material
Source: publisher figshare collection journal article supplement (https://tandf.figshare.com/articles/dataset/_/13241237)

**Supplementary material #1 for « Use of recurrence plots for identification and extraction of patterns in humpback whale song recordings »**

**Recording #3 from Abrolhos archipelago, 2000 : annotated spectrogram of the first three songs**



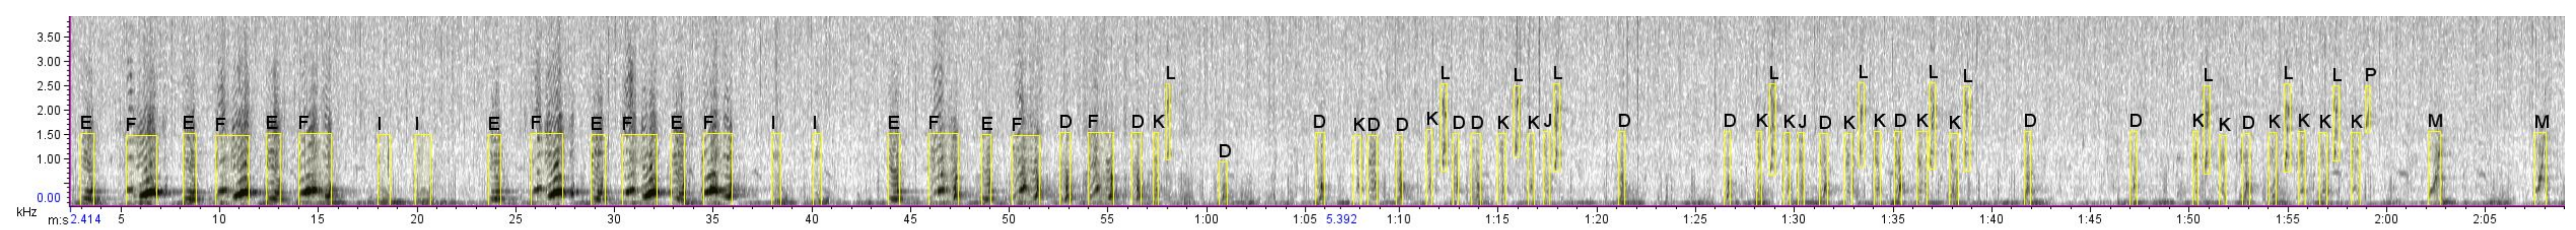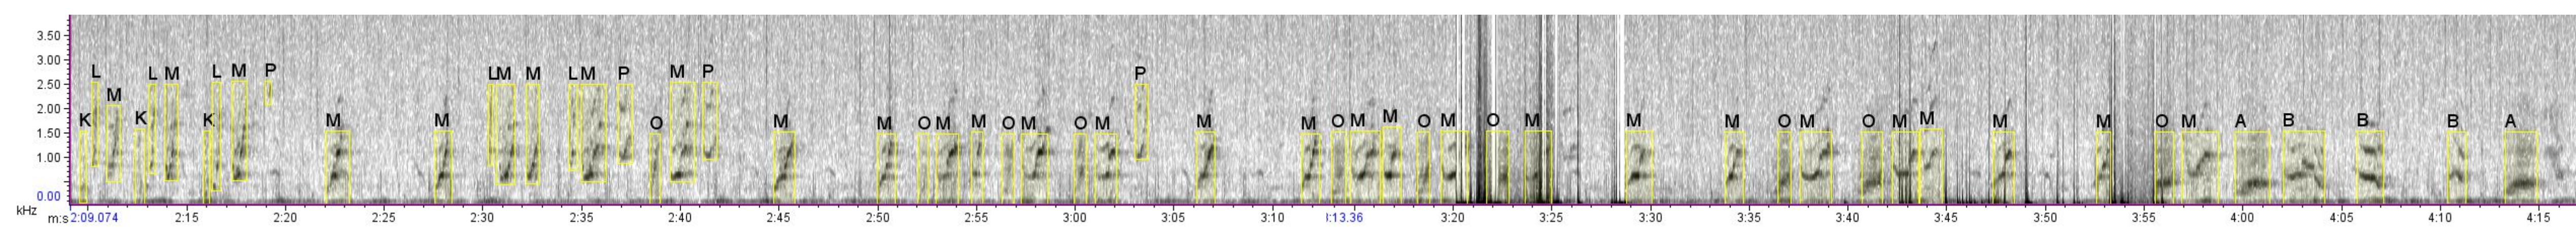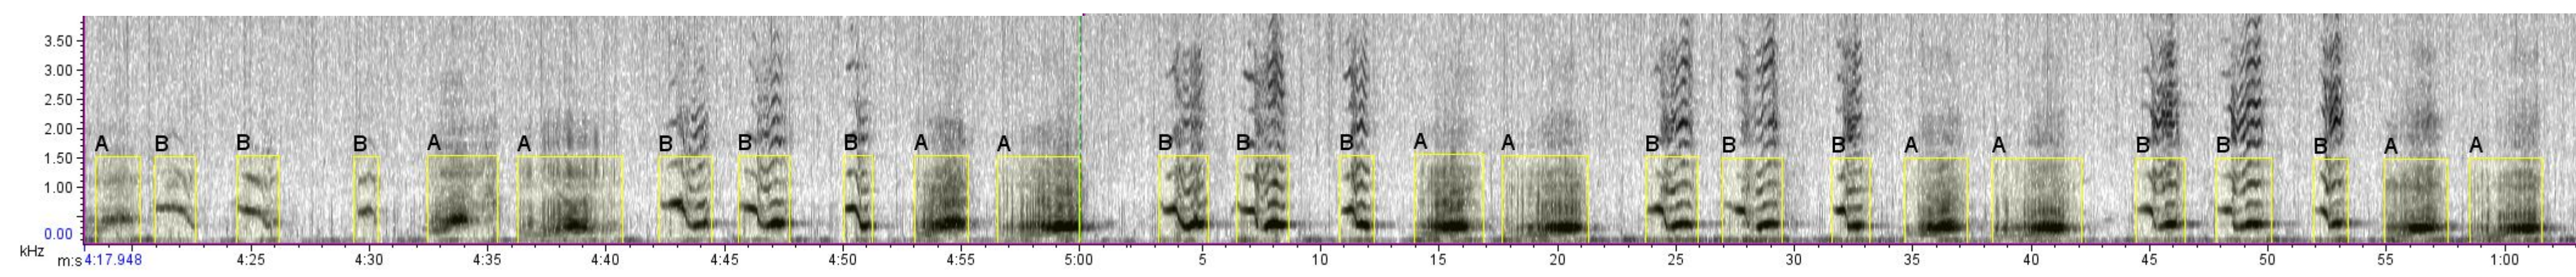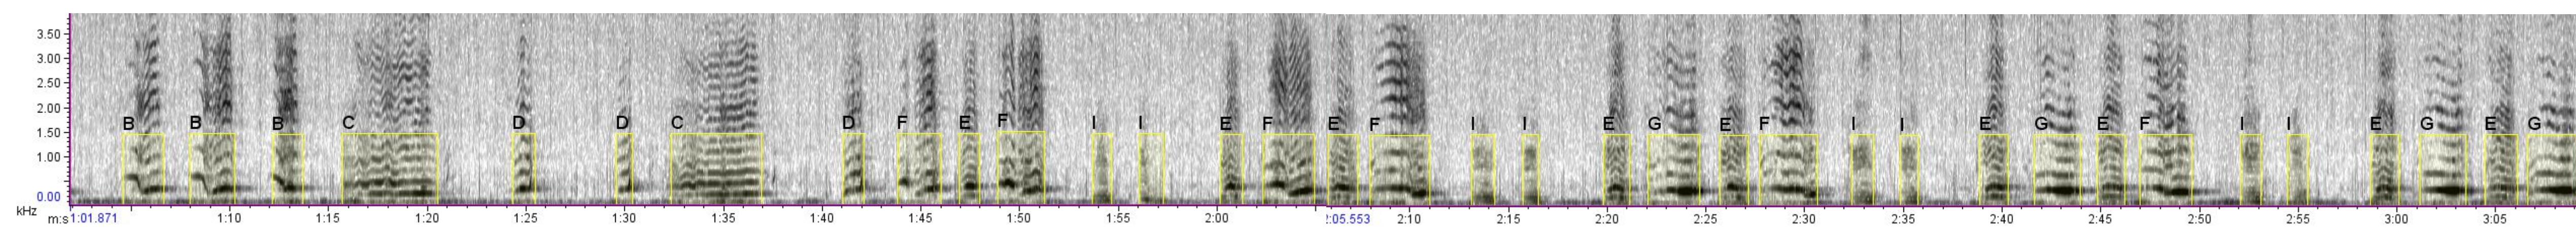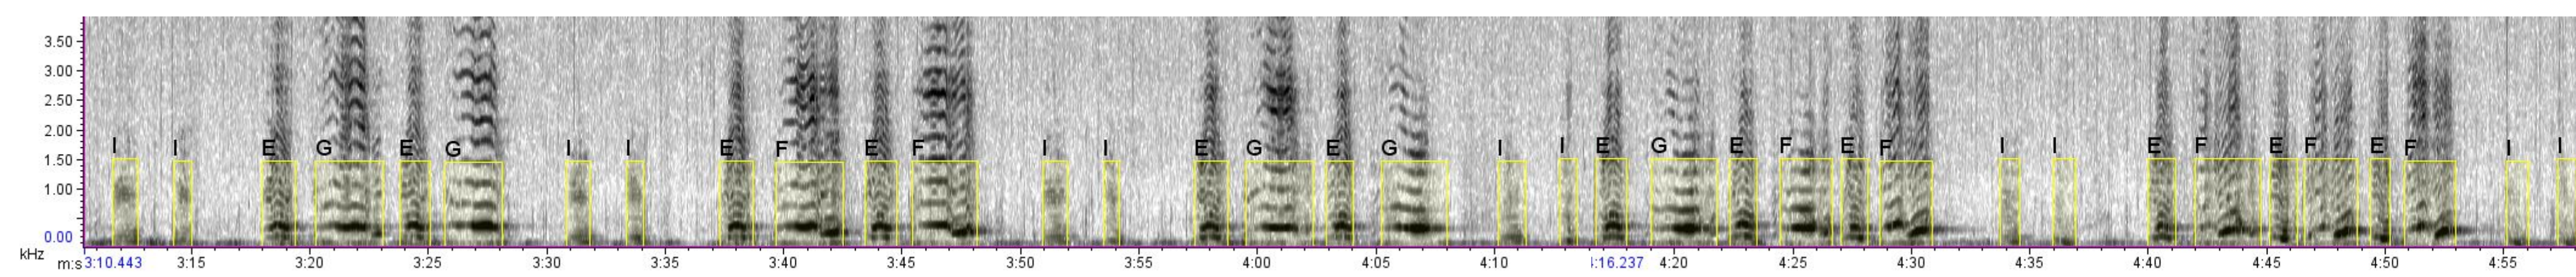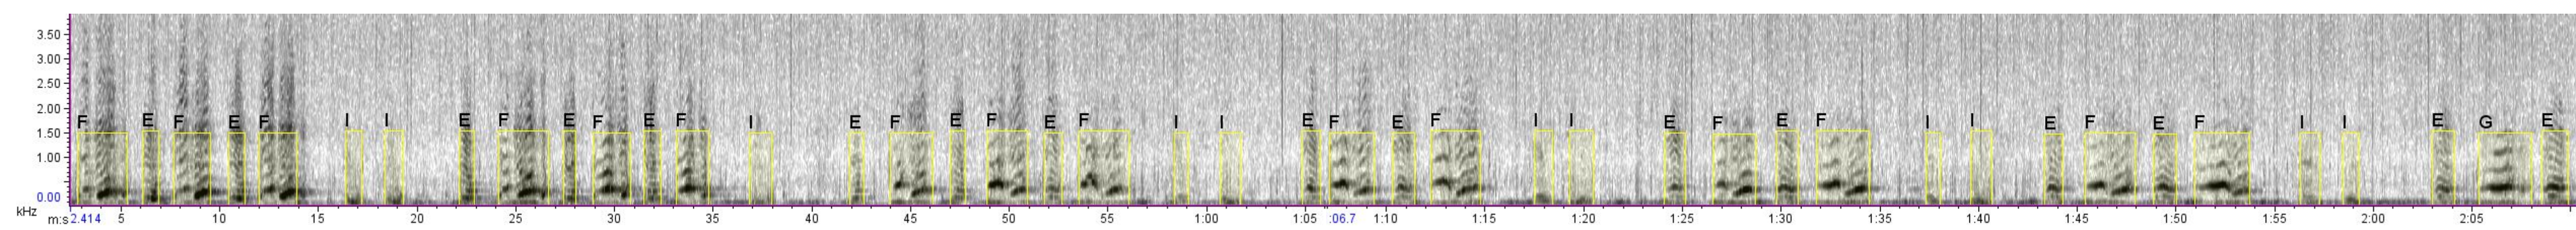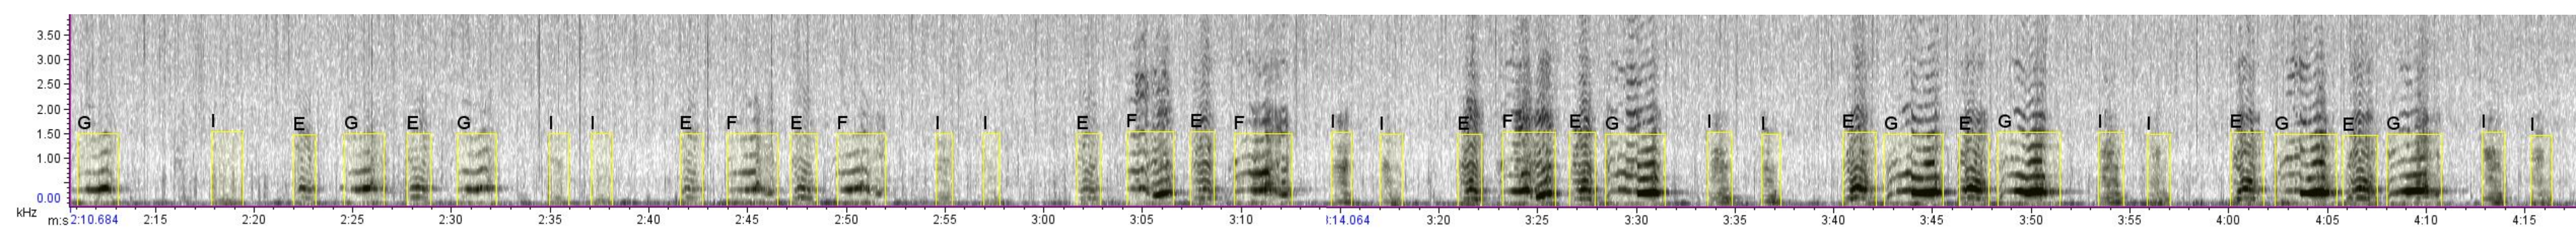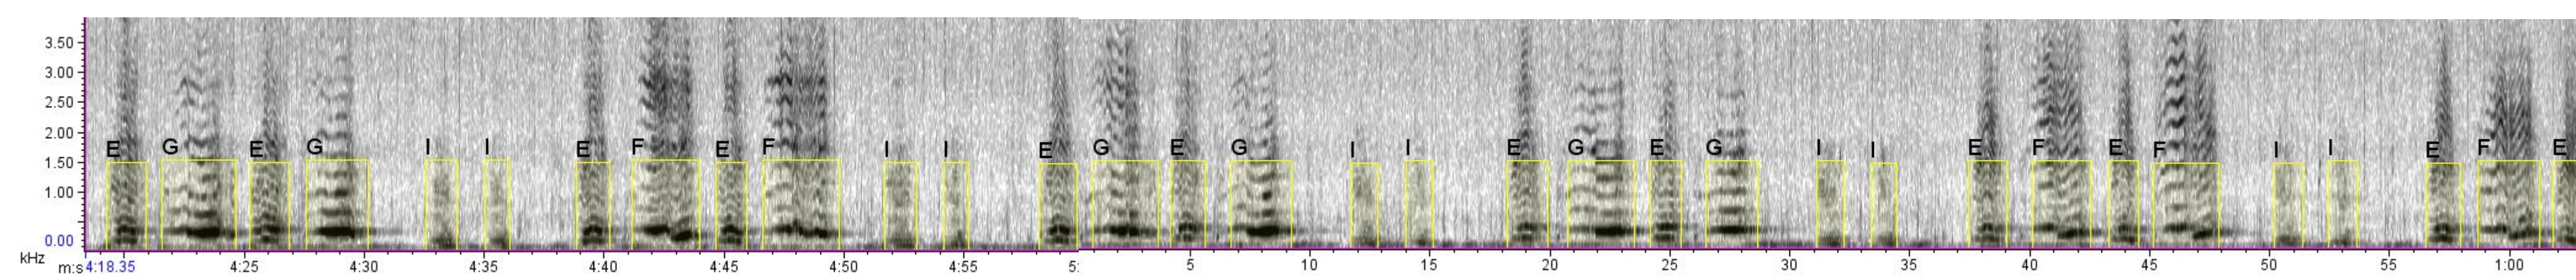



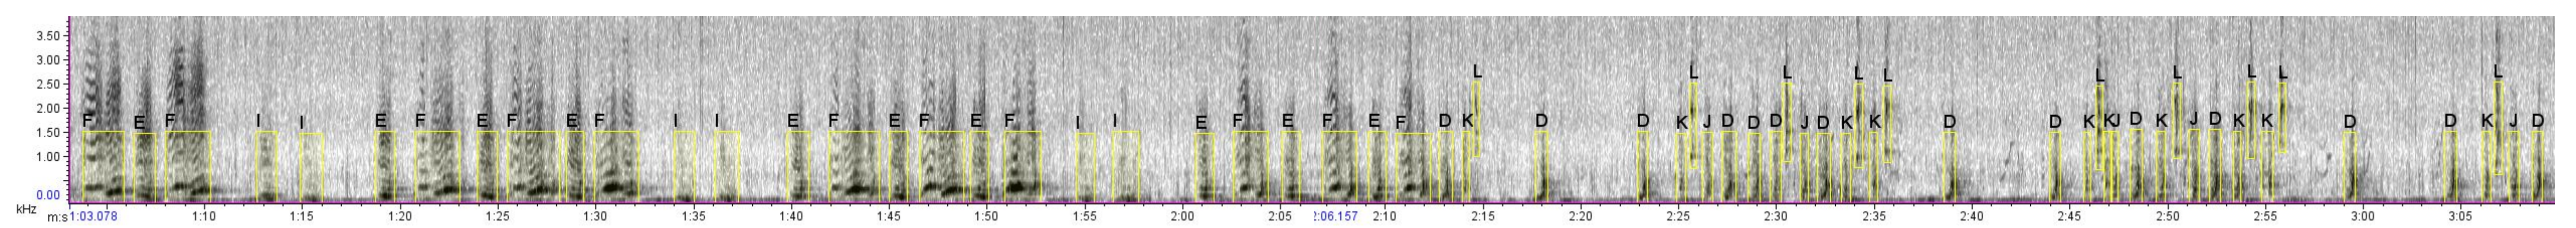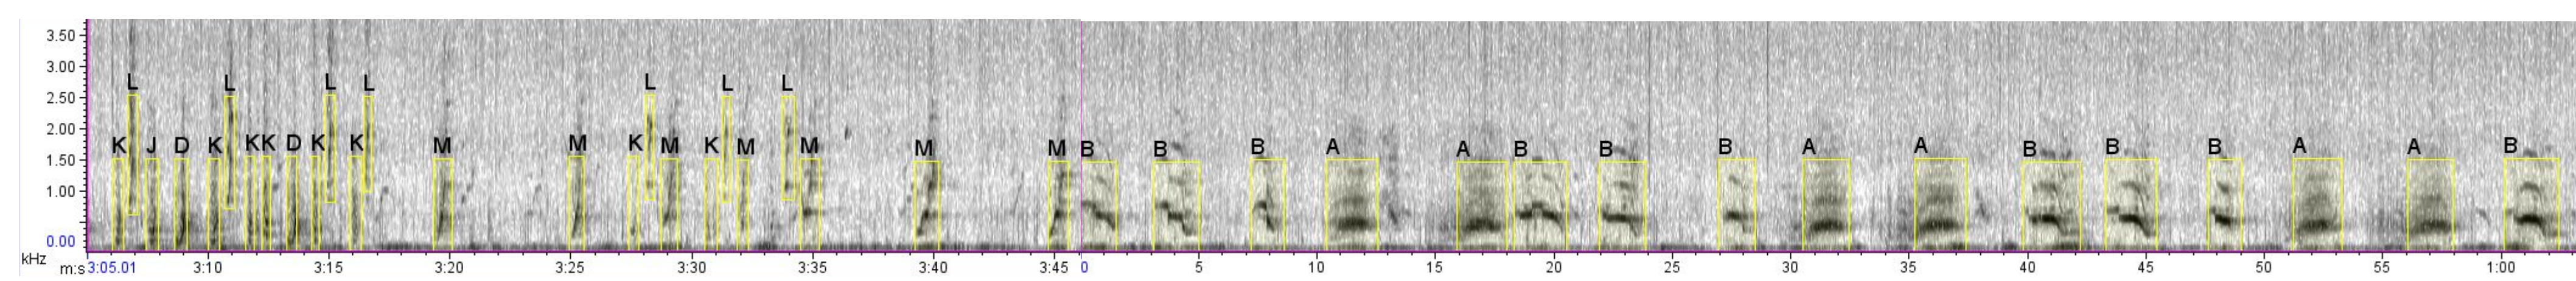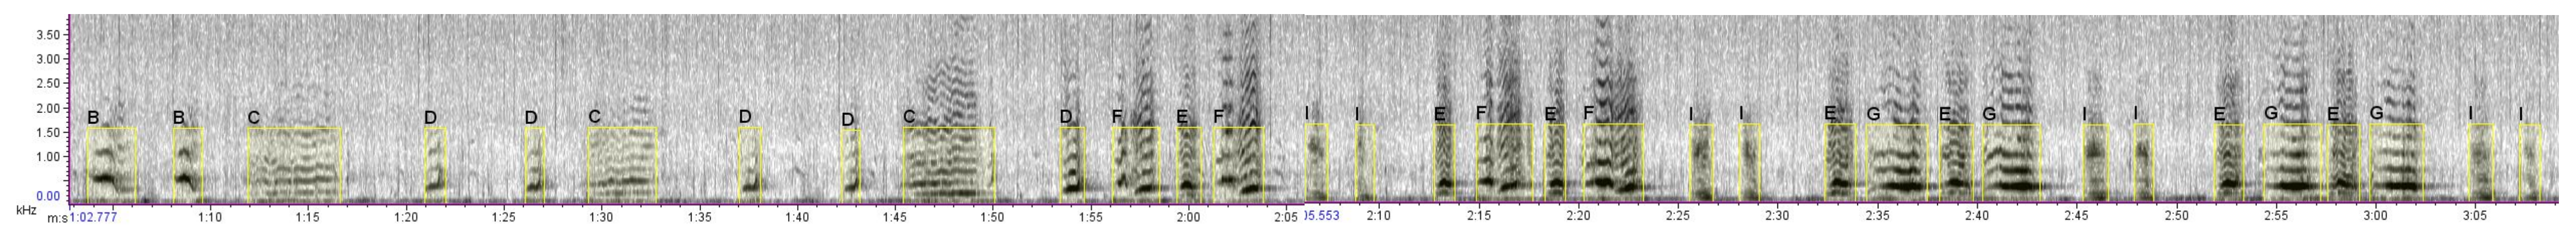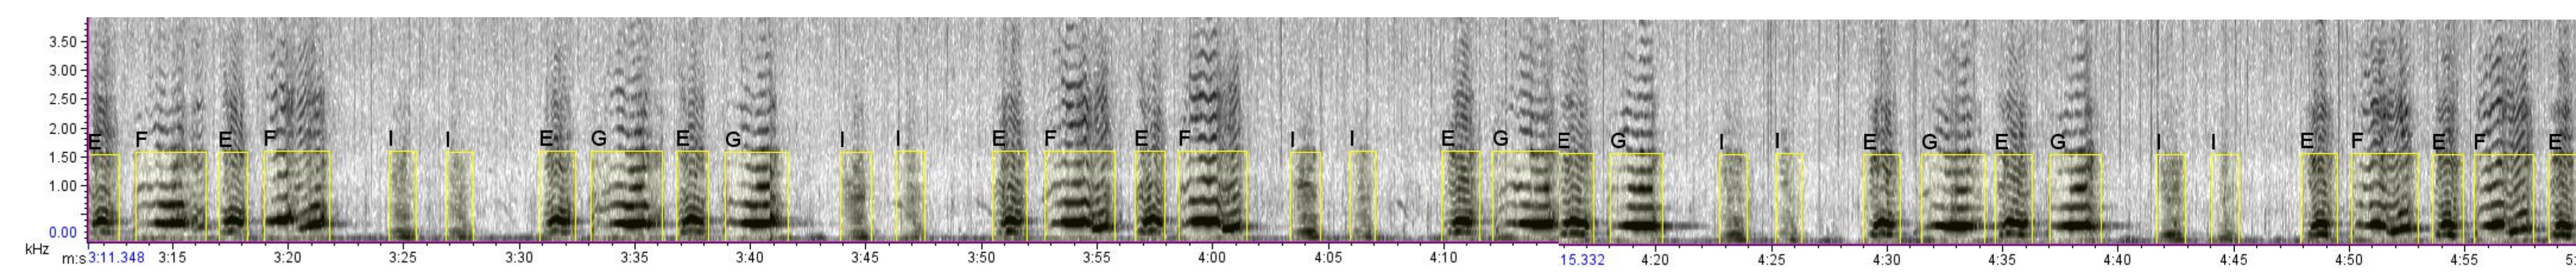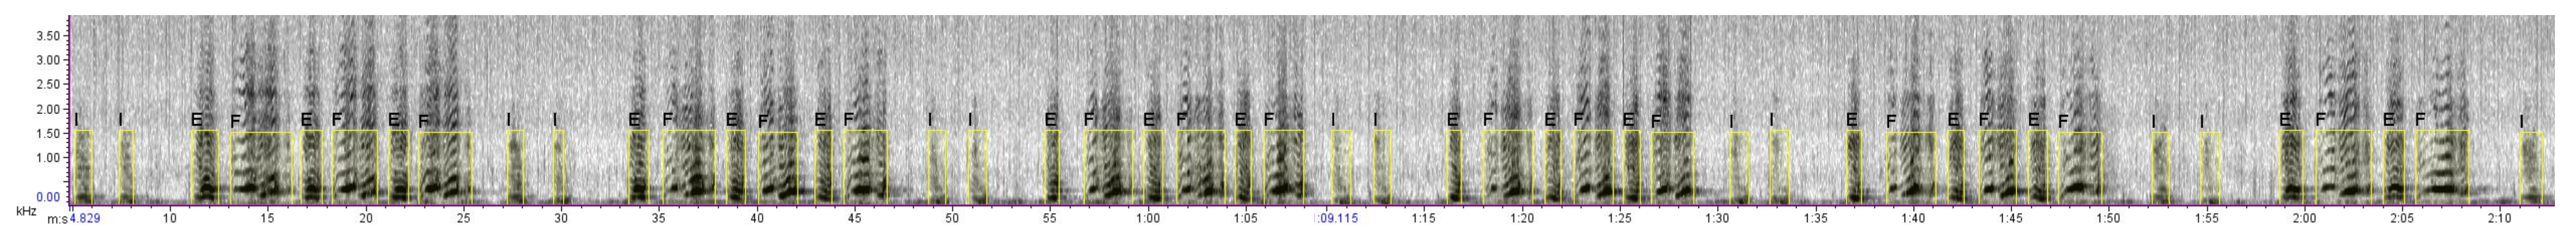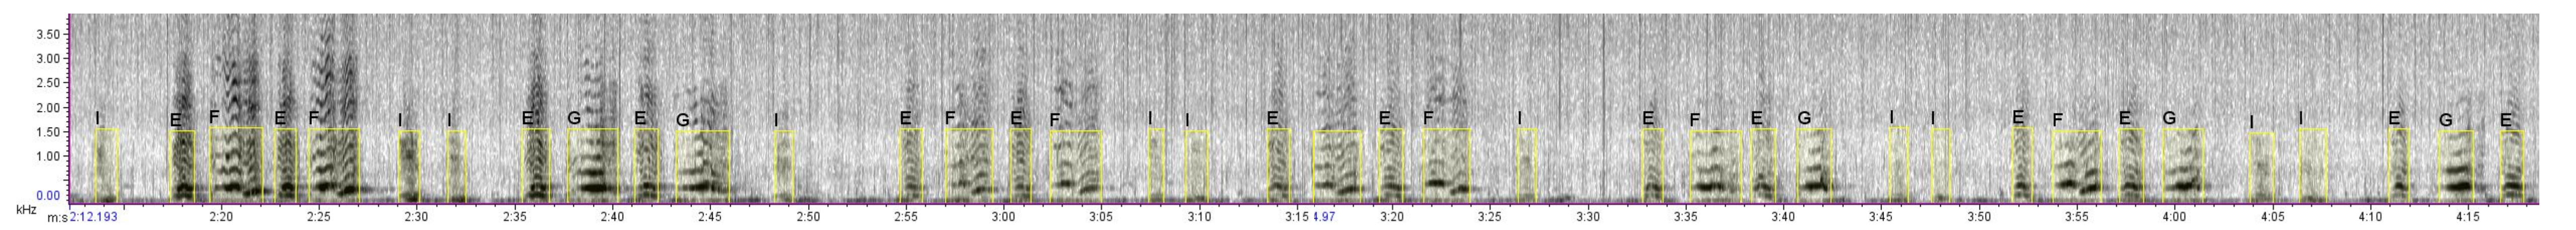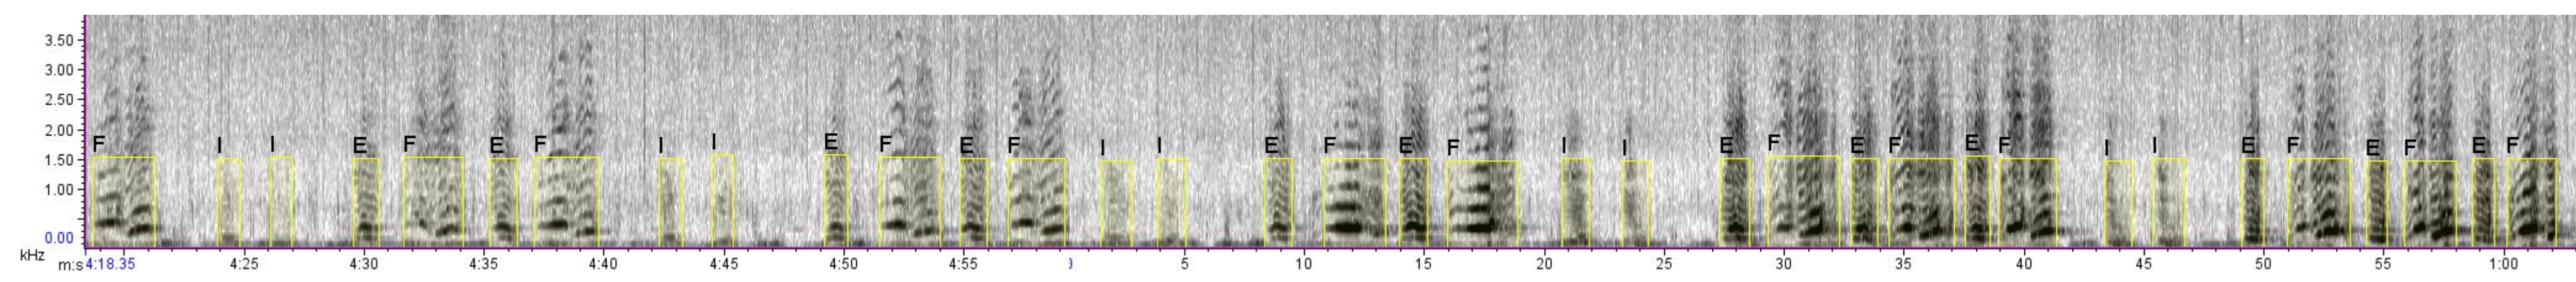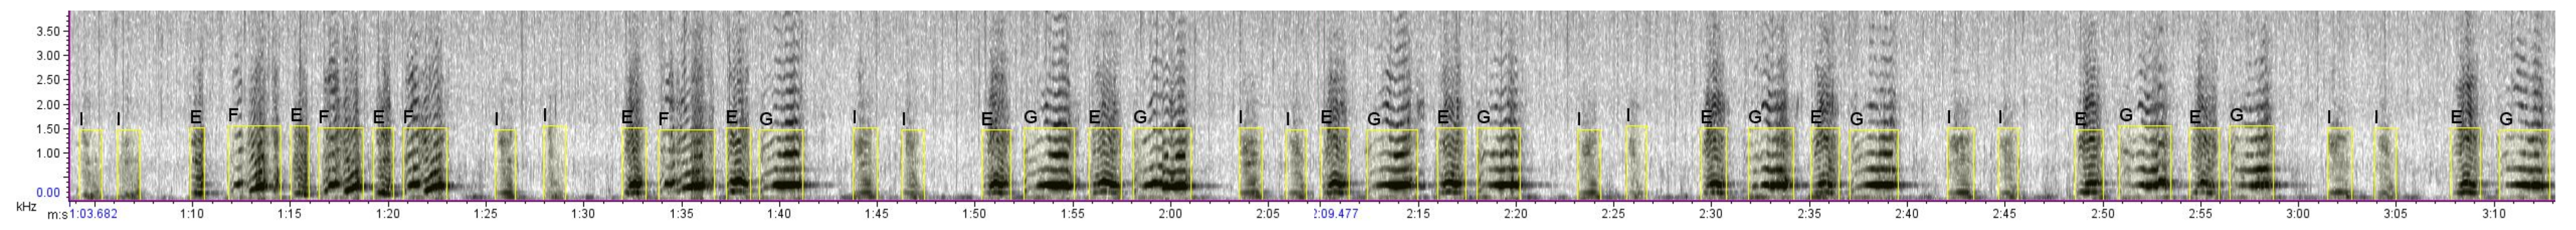



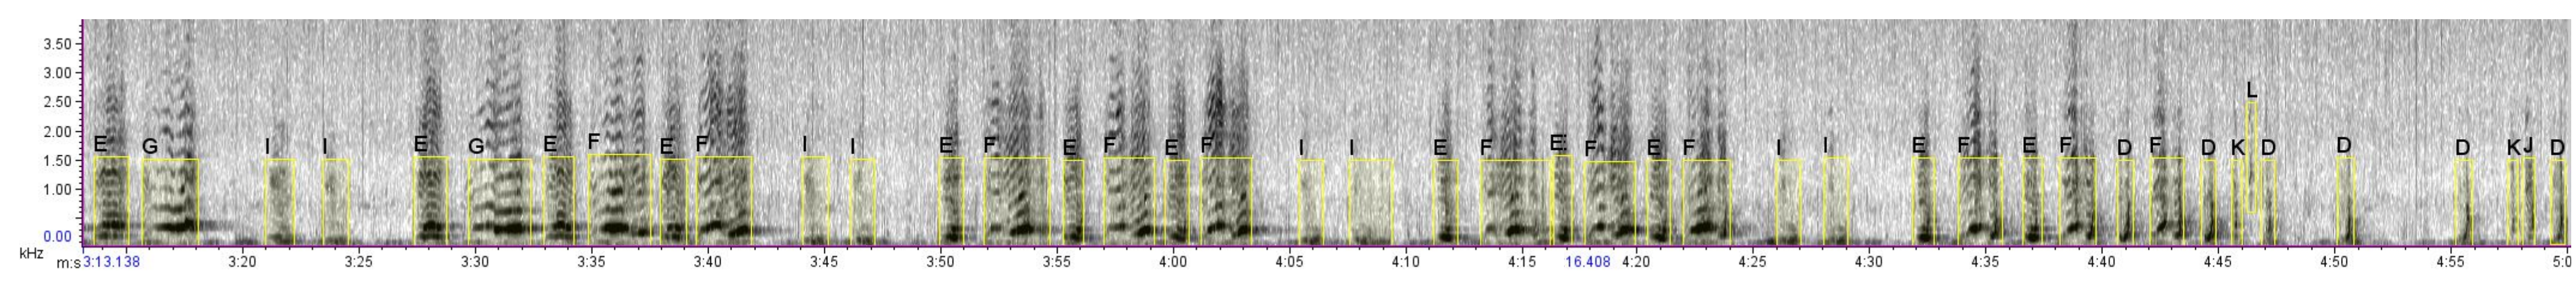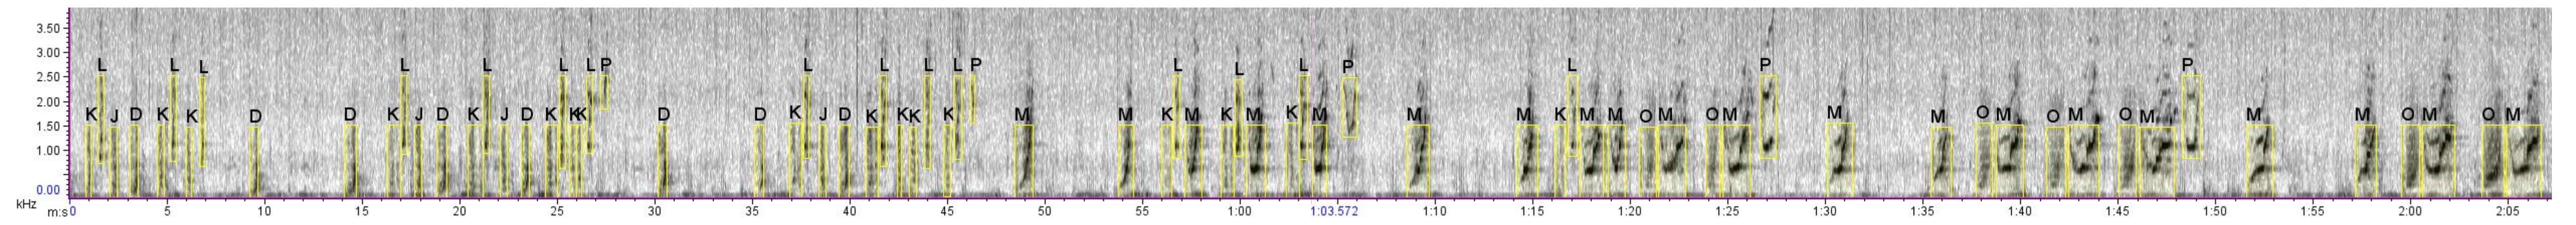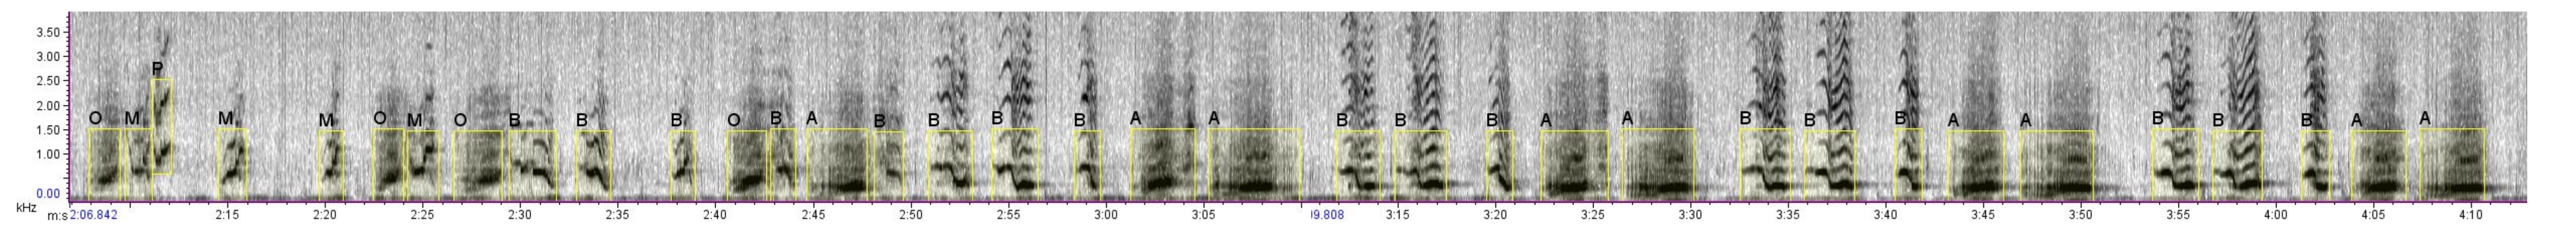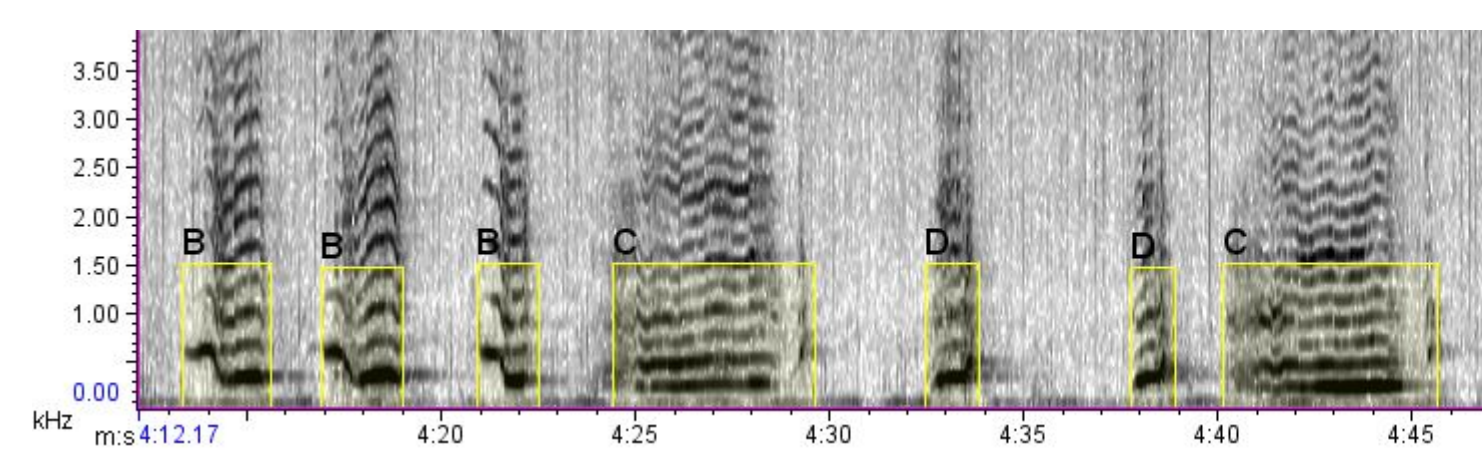

Supplement: Supplementary file 1 [file 1]
