# Supplementary material
Source: publisher figshare collection journal article supplement (https://tandf.figshare.com/articles/dataset/_/13241237)
Supplement: Supplementary file 2 [file 1]

**Supplementary material #2 for « Use of recurrence plots for identification and extraction of patterns in humpback whale song recordings »**

**Recording #3 from Abrolhos Archipelago, 2000, transcribed as a string of units**

[illegible]

Extraction of the songs from the string of units : Manually by a trained analyst (left) and automatically by our routine (Right, bold letters)

## MANUAL EXTRACTION

Partial song :

EFEFEFIIEFEFEFIIEFEFDF

Song 1 :

DKLDDKDDKLDDKLKJLDDKLKJDKLKDKLKLDDKLKDK  
LKKLKPMMLKMLKMLMPMMLMLMPOMPMMOMMOMOM  
MMOMMOMOMMMOMOMMMOMMOMABBBAAABBBAAABBB  
AABBBAAABBBAAABBCDDCDFEFIIIEFEFIIIEGEFIIIEG  
EFIIIEGEGIIIEGEGIIIEFEFIIIEGEGIIIEGEFEFIIIEFE  
FEFIIIEFEFEFIIIEFEFEFEFEFEFEFIIIEFEFIIIEFEFI  
IEFEFIIIEGEGIEGEGIIIEFEFIIIEFEFIIIEFEGIIIEGE  
GIIIEGEGIIIEGEGIIIEFEFIIIEGEGIIIEGEGIIIEFEFII  
EFEFEFIIIEFEFEFIIIEFEFEFEFEFEFEFEFEFEFEFEFE

Song 2 :

DKLDDKLJDDDLJDKLKLDDDKLKJDKLJDKLKLDDDKLJD  
KLKKDKLKLMMKLMKLMKLMMLMMLMMPMMMMOMOMMM  
MOMMOMOMPMMOMOMOBBAABBAABBAABBBBCDDCD  
DCDFEFIIIEFEFIIIEGEGIIIEGEGIIIEFEFIIIEGEGIIIE  
FEFIIIEGEGIIIEGEGIIIEFEFEFIIIEFEFEFIIIEFEFEF  
IIIEFEFEFIIIEFEFEFIIIEFEFEFIIIEFEFIIIEFEFIIIE  
GEGIEFEFIIIEFEFIEFEGIIIEFEGIIIEGEFIIIEFEFII  
EFEFIIIEFEFIIIEFEFEFIIIEFEFEFIIIEFEFEFIIIEFE  
GIIIEGEGIIIEGEGIIIEGEGIIIEGEGIIIEGEGIIIEGEFEF  
IIIEFEFEFIIIEFEFEFIIIEFEFDF

Song 3 :

DKLDDDKJDKLJDKLKLDDKLJDKLJDKLKKLPDDKLJD  
KLKKLKLPMMKLMKLMKLMMPMMKLMMOMOMPMOMOMOM  
PMMOMOMOMPMOMOMBBBBBABBBBAABBBBAABB  
BAABBBBCDDCEFEFIIIEFEFIIIEFEGIIIEGEGIIIEGEGII  
IEGEFIIIEFEFIIIEGEGIIIEFEFIIIEFEFEFIIIEFEFEF  
IIIEFEFIIIEFEFIIIEFEGIIIEFEFEFIIIEFEGIIIEFEFI  
IEFEFIIIEFEFIIIEFEGIIIEGEGEFIIIEFEFEFIIIEFEF  
IIIEGEGIIIEGEFIIIEGEGIIIEGEFIIIEFEFIIIEGEGIIIE  
GEFEFIIIEFEFEFIIIEFEFEFIIIEFEFDF

Song 4 :

DKLDDKLJDKLJDKLKLDDKLKJDKLJDKLKLMMKLMK  
LMPPMMKLMMKMPPOMMOMMOMMOPMMOMOMOPMMO  
MOMABBBABABBBAAABBAABBBAAABBAABBBAAABBA  
ABBBAAABBCDDCEFEFIIIEFEGIIIEGEGIIIEGEGIIIEG  
EGIIIEFEGIIIEFEFIIIEFEFEFIIIEFEFEFIIIEFEFEFI  
IEFEFEFIIIEFEFIIIEGEFIIIEFEFIIIEFEFIIIEFEFI  
EFEFIIIEFEFIIIEFEFIIIEGEGIIIEGEGIIIEGEGIIIEG  
FEFIIIEFEFEFIIIEFEFEFIIIEFEFEFIIIEFEFEFIIIEF  
FEFIIIEFEFEFIIIEFEFIIIEFEFIIIEFEFEFIIIEFEFEFIIIEF

## AUTOMATED EXTRACTION

Partial song :

**EFEFEFIIEFEFEFIIEFEF**

Song 1 :

DFDKLDDKDDKLDDKLJLDDKLKJDKLKDCLKLDDKLK  
DKLKKLKPMMLKMLKMLMPMLMMLMPOMPMOMMOMO  
MPMMOMMOMOMMMOMOMMMOMABBBBAABBBAAAB  
BBAABBBAAABBBABBCDDCDFEIIIEFEIIEGEFII  
EGEFIIIEGEGIIIEGEGIIIEFEFIIIEGEGIIIEGEFEFII  
FEFEFIIIEFEFEFIIIEFEFEFIIIEFEFEFIIIEFEFII  
FIIIEFEFIIIEGEGIIIEGEGIIIEFEFIIIEFEFIIIEFEFII  
GEGIIIEGEGIIIEGEGIIIEFEFIIIEGEGIIIEGEGIIIEFEF  
IIIEFEFEFIIIEFEFEFIIIEFEFEFIIIEFEFEFD

Song 2 :

DKLDDKLJDDDLJDKLKLDDKLKJDKLJDKLKLDDKLJD  
KLKKDKLKLMMKLMKLMMLMMLMPMMMMOMOMMM  
MOMMOMOMPMMOMOMOBBAABBAABBAABBBCCDDCD  
DCDFEFIEFEFIEGEGIEGEGIEFEFIEGEGIE  
FEFIEGEGIEGEGIEFEFEFIEFEFEFIEFEFEF  
IEFEFEFIEFEFEFIEFEFEFIEFEFIEFEFIE  
GEGIEFEFIEFEFIEFEGIEFEGIEGEFIEFEFII  
EFEFIEFEFIEFEFEFIEFEFEFIEFEFEFIEFE  
GIEGEGIEGEGIEGEGIEGEGIEGEGIEGEGIEFEF  
IEFEFEFIEFEFEFIEFEFD

Song 3 :

DFDKLDDDKJDKLJDKLKDDKLJDKLJDKLKKLPDDKL  
JDKLKKLKLPMMLMKLMKLMMPMKLMMOMOMPMOMOM  
OMPMOMOMOMPMOMOMBBBBBABBBBAABBBAAABBBAA  
BBBAABBBBCDDCEFEFIIEFEFIIEFEGIIEGEGIIEGE  
GIIEGEFIIEFEFIIEGEGIIEFEGIIEFEFEFIIEFEF  
EFIIEFEFIIEFEFIIEFEGIIEFEFEFIIEFEGIIEFE  
FIIEFEFIIEFEFIIEFEGIIEGEGFIIEFEFEFIIEF  
EFIIEGEGIIEGEFIIEGEGIIEGEFIIEFEFIIEGEGII  
IEGEFEFIIEFEFEFIIEFEFEFIIEFEFD

Song 4 :

DFDKLDDKLJDKLJDKLKLDDKLKJDKLJDKLKLMMKL  
MKLMMPPMKLMMKMPOMMOMMOMPMOMOMOMPM  
MOMOMABBBABABBBABBBAAABBBAAABBBAAAB  
BAABBBAAABBBCCDDCEFEFIIIEFEGIIIEGEGIIIEGEGII  
EGEGIIIEFEGIIIEFEFIIIEFEFEFIIIEFEFEFIIIEFEFE  
FIIIEFEFEFIIIEFEFIIIEGEGIIIEFEFIIIEFEFIIIEFEF  
IIIEFEFIIIEFEFIIIEFEFIIIEGEGIIIEGEGIIIEGEGIIIE  
GEFEFIIIEFEFEFIIIEFEFEFIIIEFEFEFIIIEFEFEFII  
FEFEFIIIEFEFEFIIIEFEFIIIEFEFEFIIIEFEFEFIIIEFEFE

Song 5 :

DKJDKLJDKLKLDDKLKJDKLJDKLKLDDKLKDKLKL  
PMMKKLMKKLMMKKLMPMMLMMMMMMOMMOMOMPPMMOM  
OMOMPMOMOBBAABBAABBAABBCDDCEFEFIIIEFEFI  
IEGEGIIIEGFEFIIIEGFEFIIIEGEGIIIEGFEFIIIEGEGIIIEG  
EGIIIEGFEFIIIEFEFIIIEFEFIIIEFEFEFIIIEFEFEFIIIE  
FEFDF

Song 6 :

DDDKJDKLJDDKLKLDDKLKJDKLJDKLKLPMMLMLMM  
KLMPMMKLMMOMPMOMMOMOMPMOMOMMOMPMOMOMOM  
MOMPMAMABBAABBAABBAABBAABBAABBAABBAABBA  
ABBAABBCDDCDFEFIIIEFEFIIIEGEGIIIEGEGIIIEG  
EGIIIEGFEFIIIEGFEFIIIEGFEFIIIEFEFEFIIIEFEFEFI  
IEFEFEFIIIEFEFEFIIIEFEFIIIEFEFIIIEFEFIIIEFEF  
IIIEFEFIIIEFEFIIIEFEFIIIEGEGIIIEGEGIIIEGEGIIIE  
GEFIIIEGEGIIIEFEFEFIIIEFEFEFIIIEFEFEFIIIEFEF  
EFIIIEFEFEFIIIEFEFIIIEFEFEFIIIEFEFEF

Song 7 :

DKDDFDFDKKDJLDDKLJDDKLKJDKLKLDDKLKDDKLJ  
JLJLQLQMMKLMLMLMPMMKLMMKLMPMMOMMOMMOM  
PMOMOMMOMPMOMOMOMPMOMOMOBBAABBAABBA  
ABBCDDCDDCEFEFIIIEFEFIIIEGEGIIIEGEGIIIEGEF  
EFIIIEFEFEFIIIEFEFEFIIIEFEFEFIIIEFDF

Song 8 :

DKJDKLDDKLJDKLJDKLJKLKLDDLKDKLJDKLKLPM  
MLMLMLMPPMMLMMMPMMOMMOMMOMPMOMOMMOMPM  
MOMOMOBBAABBAABBAABBAABBCDDCDFIIEFEFI  
FEGIIIEGFEFIIIEGEGIIIEGFEFIIIEFEGIIIEGFEFIIIEF  
EFEFEFIIIEFEFIIIEFEFIIIEFEFIIIEFEFIIIEFEFIIIE  
GIIIEGEGFEFIIIEFEFIIIEGEGFEFIIIEFEFEFIIIEFEFEF  
IIIEFEFEFIIIEFEFEFIIIEFEFEFIIIEFDFDF

Partial song

DKLDDKLKDDKLKDKLDKJDKLJDKLJDKKLKLLDDKLK  
DDKLKDKLKLPMMLKLMLMPMMOMPMOMPMOMPMOM  
MOMOMPM

Song 5 :

DFDJLDDKJDKLJDKLKLDDKLKJDKLJDKLKLDDKL  
KDKLKLPMMLKLMLMPMMKLMMKLMPMMLMMMMMMOMMOMOM  
PPMMOMOMPMOMOMOBBAABBAABBAABBCDDCEFEFI  
IEFEFIIIEGEGIIIEGFEFIIIEGFEFIIIEGEGIIIEGFEFIIIEG  
EGIIIEGEGIIIEGFEFIIIEFEFIIIEFEFIIIEFEFEFIIIEFE  
FEFIIIEFEF

Song 6 :

DFDDDKJDKLJDDKLKLDDKLKJDKLJDKLKLPMMLML  
MMKLMPMMKLMMOMPMOMMOMOMPMOMOMMOMPMOMOM  
MOMOMPMAMABBAABBAABBAABBAABBAABBAABBAABBA  
BAABBAABBCDDCDFEFIIIEFEFIIIEGEGIIIEGEGIIIEG  
EGEGIIIEGFEFIIIEGFEFIIIEGFEFIIIEFEFEFIIIEFEFE  
FIIIEFEFEFIIIEFEFEFIIIEFEFIIIEFEFIIIEFEFIIIEF  
EFIIIEFEFIIIEFEFIIIEFEFIIIEGEGIIIEGEGIIIEGEGII  
IEGFEFIIIEGEGIIIEFEFEFIIIEFEFEFIIIEFEFEFIIIEF  
EFEFIIIEFEFEFIIIEFEFIIIEFEFEFIIIEFEFEF

Song 7 :

FDKDDFDFDKKDJLDDKLJDDKLKJDKLKLDDKLKDDKL  
JLJLQLQMMKLMLMLMPMMKLMMKLMPMMOMMOMMOM  
MPMMOMOMMOMPMOMOMOMPMOMOMOBBAABBAABBA  
AABBCDDCDDCEFEFIIIEFEFIIIEGEGIIIEGEGIIIEGE  
FEFIIIEFEFEFIIIEFEFEFIIIEFEFEFIIIEFDF

Song 8 :

DFDKJDKLDDKLJDKLJDKLJKLKLDDLKDKLJDKLKL  
MMLMLMLMPPMMLMMMPMMOMMOMMOMPMOMOMMOM  
PMOMOMOBBAABBAABBAABBAABBCDDCDFIIEFEFI  
IEFEGIIIEGFEFIIIEGEGIIIEGFEFIIIEFEGIIIEGFEFIIIEF  
EFEFEFEFIIIEFEFIIIEFEFIIIEFEFIIIEFEFIIIEFEFIIIE  
GEGIIIEGEGFEFIIIEFEFIIIEGEGFEFIIIEFEFEFIIIEFEF  
EFIIIEFEFEFIIIEFEFEFIIIEFEFEFIIIEFDF

Partial song

DFDKLDDKLKDDKLKDKLDKJDKLJDKLJDKKLKLLDDK  
LKDDKLKDKLKLPMMLKLMLMPMMOMPMOMPMOMPMOM  
MOMOMPM
